# Supplementary material
Source: publisher figshare collection journal article supplement (https://sage.figshare.com/ndownloader/files/22232088)
Supplement: Supplementary file [file 22232088]

**Draft Genome sequence of *Pseudarthrobacter phenanthrenivorans* strain MHSD1 a bacterial endophyte isolated from medicinal plant leaves *Pellaea calomelanos***

**Supplementary Data**

**Khuthadzo Tshishonga and Mahloro Hope Serepa-Dlamini**

Department of Biotechnology and Food Technology, Faculty of Science, University of Johannesburg, Doornfontein Campus, PO Box 17011, Doornfontein 2028, Johannesburg, South Africa

\* Correspondence:

Corresponding Author

[hopes@uj.ac.za](mailto:hopes@uj.ac.za)

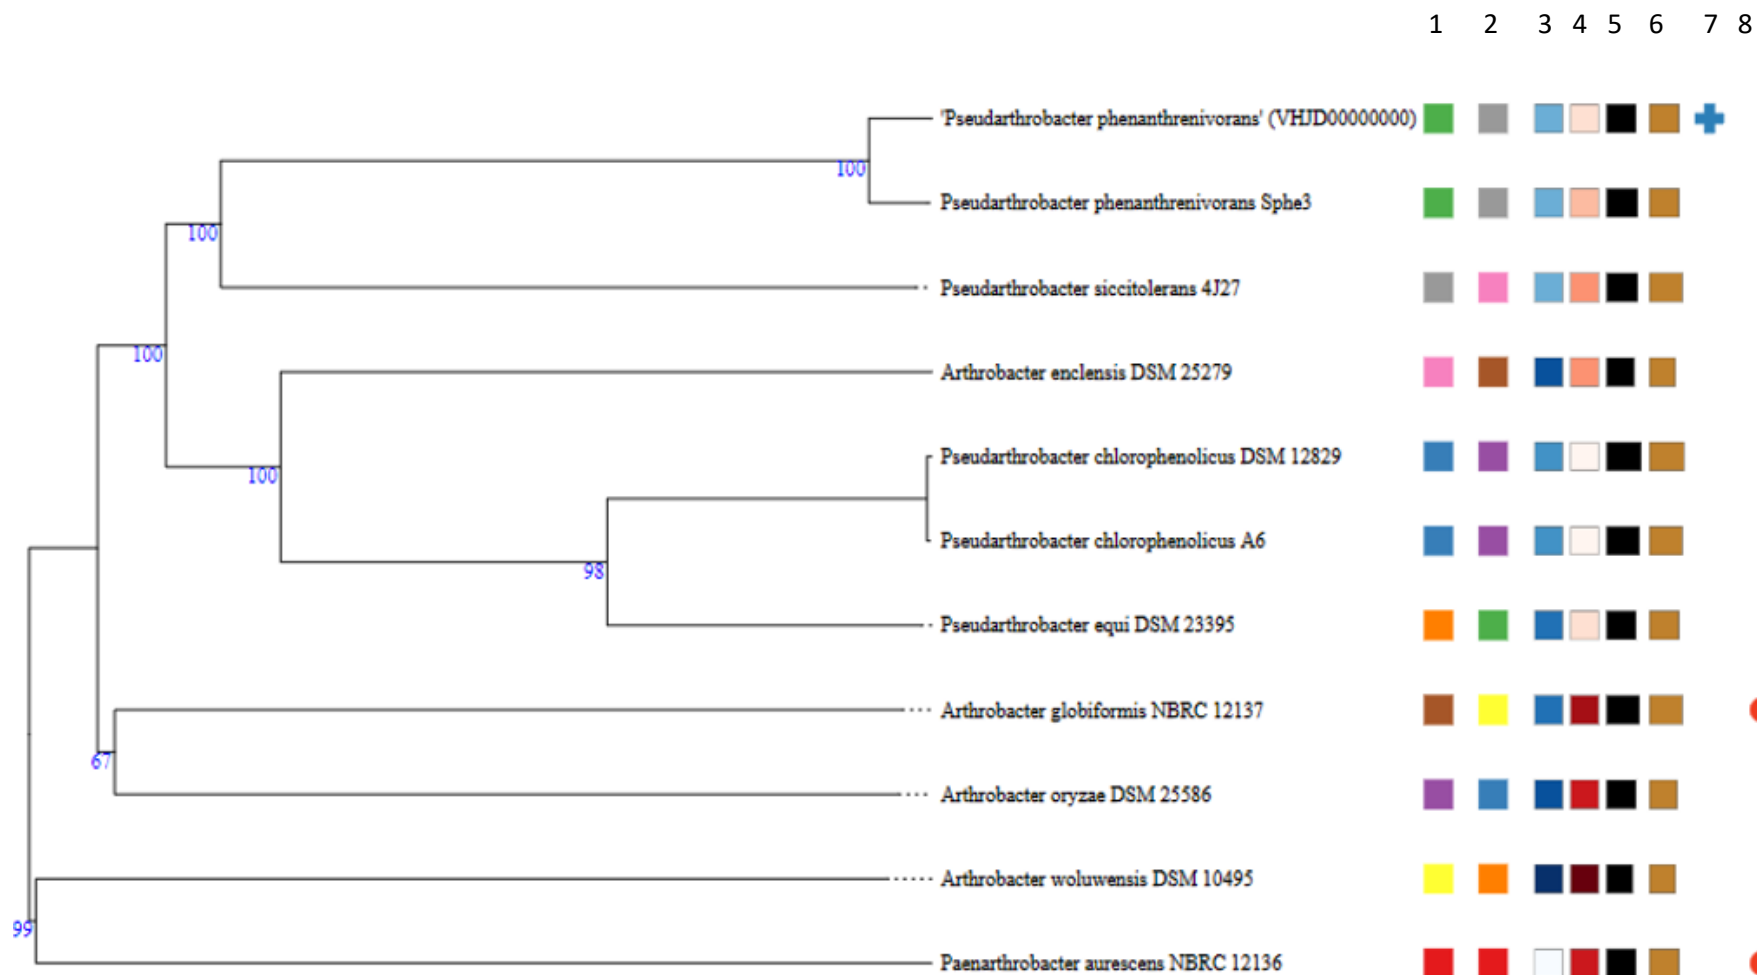

Figure 1. TYGS genome BLAST Distance Phylogeny (GBDP) tree (whole-genome sequence-based) of *Pseudarthrobacter phenanthrenivorans* strain MHSD1 and closely related species. Tree inferred with FastME 2.1.6.1 from GBDP distances calculated from genome sequences. The branch lengths are scaled in terms of GBDP distance formula d5. The numbers above branches are GBDP pseudo-bootstrap support values from 100 replications, with an average branch support of 90.6 %. The tree was rooted at the midpoint. Leaf labels are annotated by affiliation to (1) species cluster, (2) Subspecies cluster (3) percentage G+C, (4) Delta statistics, (5) Genome size, (6) Protein count, (7) User stain, (8) type species

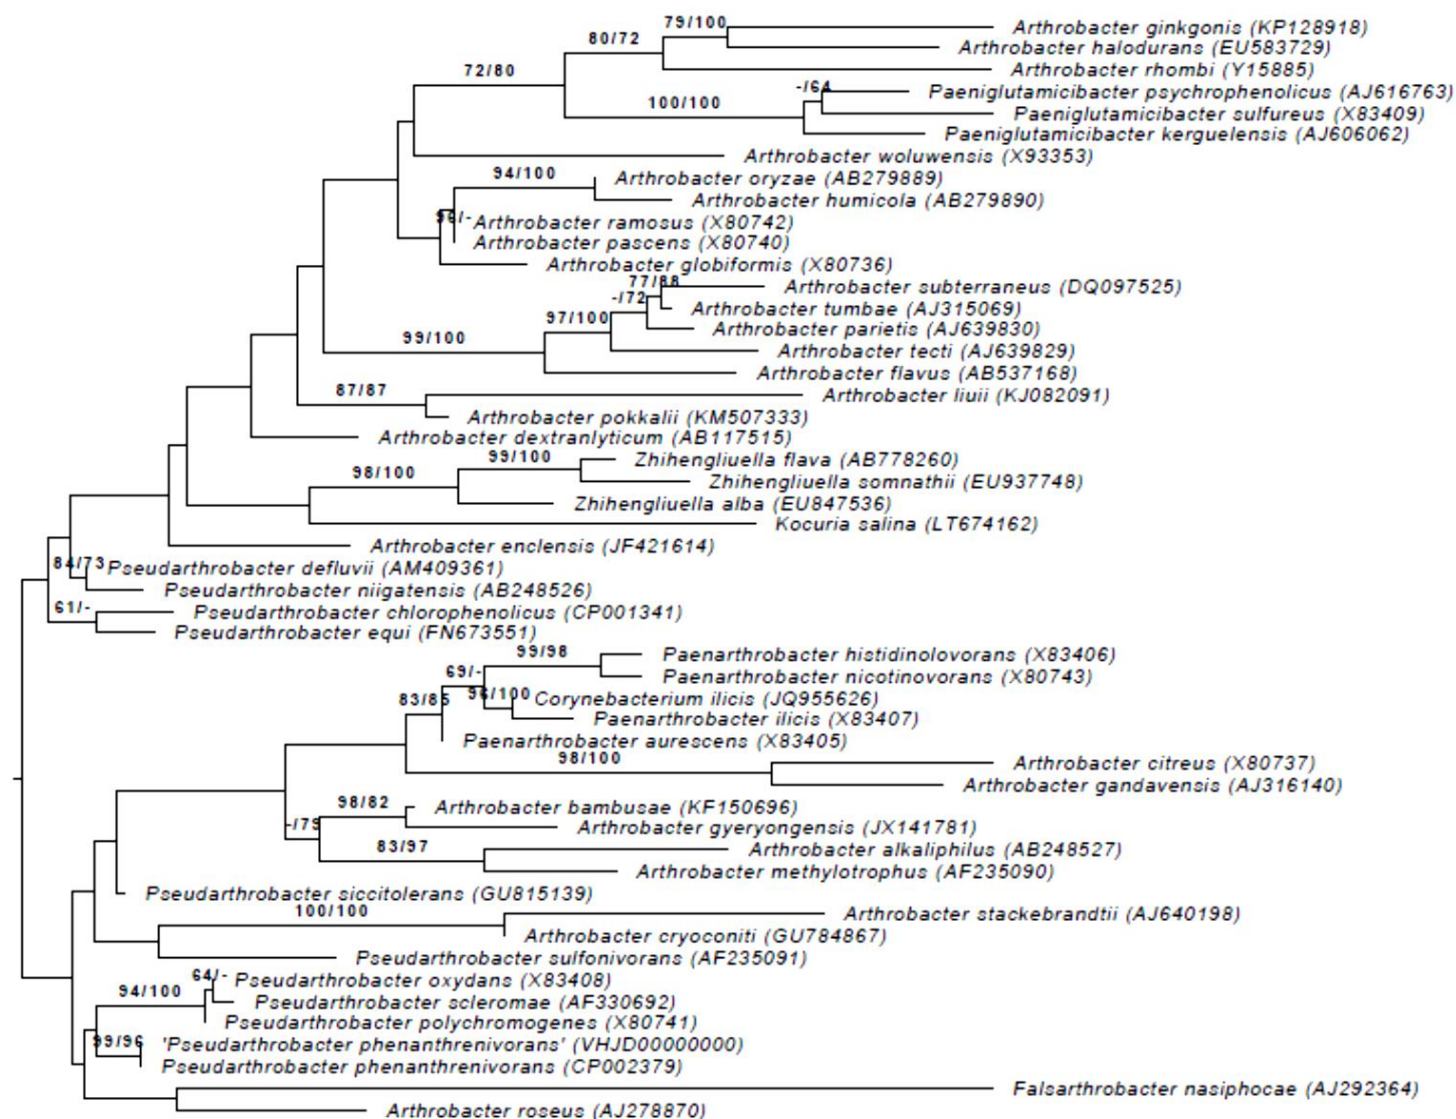

0.02

Figure 2. Maximum likelihood genome BLAST Distance Phylogeny (GBDP) tree (16S rDNA gene sequence-based) of *Pseudarthrobacter phenanthrenivorans* strain MHSD1 and closely related species, tree inferred with FastME 2.1.6.1, from GBDP distances calculated from 16S rDNA gene sequences. The branch lengths are scaled in terms of GBDP distance formula d5. The numbers above branches are GBDP pseudo-bootstrap support values from 100 replications, with an average branch support of 83.3 %. The tree was rooted at the midpoint.

**Table 1. Pairwise comparisons of *Pseudarthrobacter phenanthrenivorans* strain MHSD1 vs. type strain genomes.**

| Query strain                                                    | Subject strain                                      | dDDH (d0, in %) | C.I. (d0, in %) | dDDH (d4, in %) | C.I. (d4, in %) | dDDH (d6, in %) | C.I. (d6, in %) | G+C content difference (in %) |
|-----------------------------------------------------------------|-----------------------------------------------------|-----------------|-----------------|-----------------|-----------------|-----------------|-----------------|-------------------------------|
| ' <i>Pseudarthrobacter phenanthrenivorans</i> ' (VHJD000000000) | <i>Pseudarthrobacter phenanthrenivorans</i> Sphe3   | 81.6            | [77.7 - 84.9]   | 86.2            | [83.5 - 88.4]   | 85.3            | [82.1 - 88.0]   | 0.03                          |
| ' <i>Pseudarthrobacter phenanthrenivorans</i> ' (VHJD000000000) | <i>Pseudarthrobacter siccitolerans</i> 4J27         | 41.7            | [38.3 - 45.1]   | 25.7            | [23.4 - 28.2]   | 36.5            | [33.5 - 39.6]   | 0.21                          |
| ' <i>Pseudarthrobacter phenanthrenivorans</i> ' (VHJD000000000) | <i>Pseudarthrobacter equi</i> DSM 23395             | 37              | [33.6 - 40.5]   | 24.1            | [21.7 - 26.5]   | 32.6            | [29.6 - 35.7]   | 0.79                          |
| ' <i>Pseudarthrobacter phenanthrenivorans</i> ' (VHJD000000000) | <i>Arthrobacter enclensis</i> DSM 25279             | 39.1            | [35.7 - 42.5]   | 23.9            | [21.6 - 26.3]   | 34              | [31.0 - 37.0]   | 1.76                          |
| ' <i>Pseudarthrobacter phenanthrenivorans</i> ' (VHJD000000000) | <i>Pseudarthrobacter chlorophenolicus</i> DSM 12829 | 34.3            | [31.0 - 37.9]   | 23.8            | [21.5 - 26.3]   | 30.7            | [27.7 - 33.8]   | 0.6                           |
| ' <i>Pseudarthrobacter phenanthrenivorans</i> ' (VHJD000000000) | <i>Pseudarthrobacter chlorophenolicus</i> A6        | 34.4            | [31.0 - 37.9]   | 23.8            | [21.5 - 26.3]   | 30.7            | [27.8 - 33.8]   | 0.62                          |
| ' <i>Pseudarthrobacter phenanthrenivorans</i> ' (VHJD000000000) | <i>Arthrobacter globiformis</i> NBRC 12137          | 23.6            | [20.3 - 27.3]   | 22.6            | [20.3 - 25.1]   | 22.4            | [19.6 - 25.5]   | 0.87                          |

|                                                        |                                    |      |               |      |               |      |               |      |
|--------------------------------------------------------|------------------------------------|------|---------------|------|---------------|------|---------------|------|
| 'Pseudarthrobacter phenanthrenivorans' (VHJD000000000) | Arthrobacter oryzae DSM 25586      | 20.2 | [17.0 - 23.8] | 22.5 | [20.2 - 25.0] | 19.6 | [16.9 - 22.7] | 1.76 |
| 'Pseudarthrobacter phenanthrenivorans' (VHJD000000000) | Arthrobacter woluwensis DSM 10495  | 15   | [12.1 - 18.4] | 21.7 | [19.4 - 24.1] | 15.2 | [12.7 - 18.0] | 2.77 |
| 'Pseudarthrobacter phenanthrenivorans' (VHJD000000000) | Paenarthrobacter aureus NBRC 12136 | 18   | [14.9 - 21.5] | 20.6 | [18.4 - 23.0] | 17.6 | [15.0 - 20.6] | 3.31 |

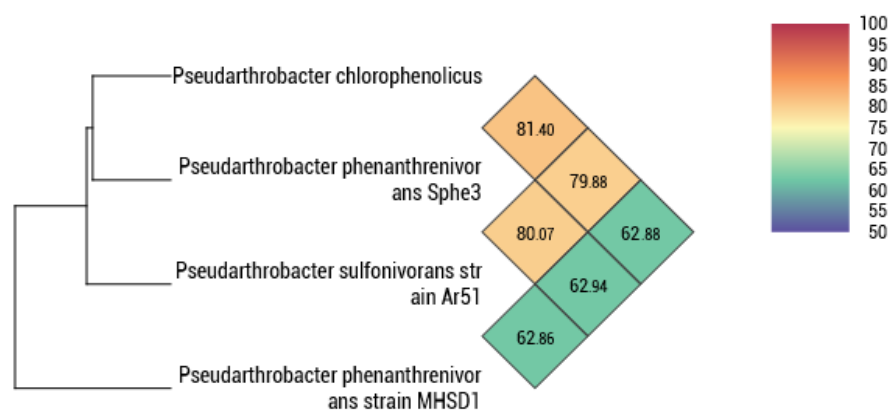

Figure 3. Heatmap generated with OAT software indicating OrthoANI values for *Pseudarthrobacter phenanthrenivorans* MHSD1 and closely related *Pseudarthrobacter* species.

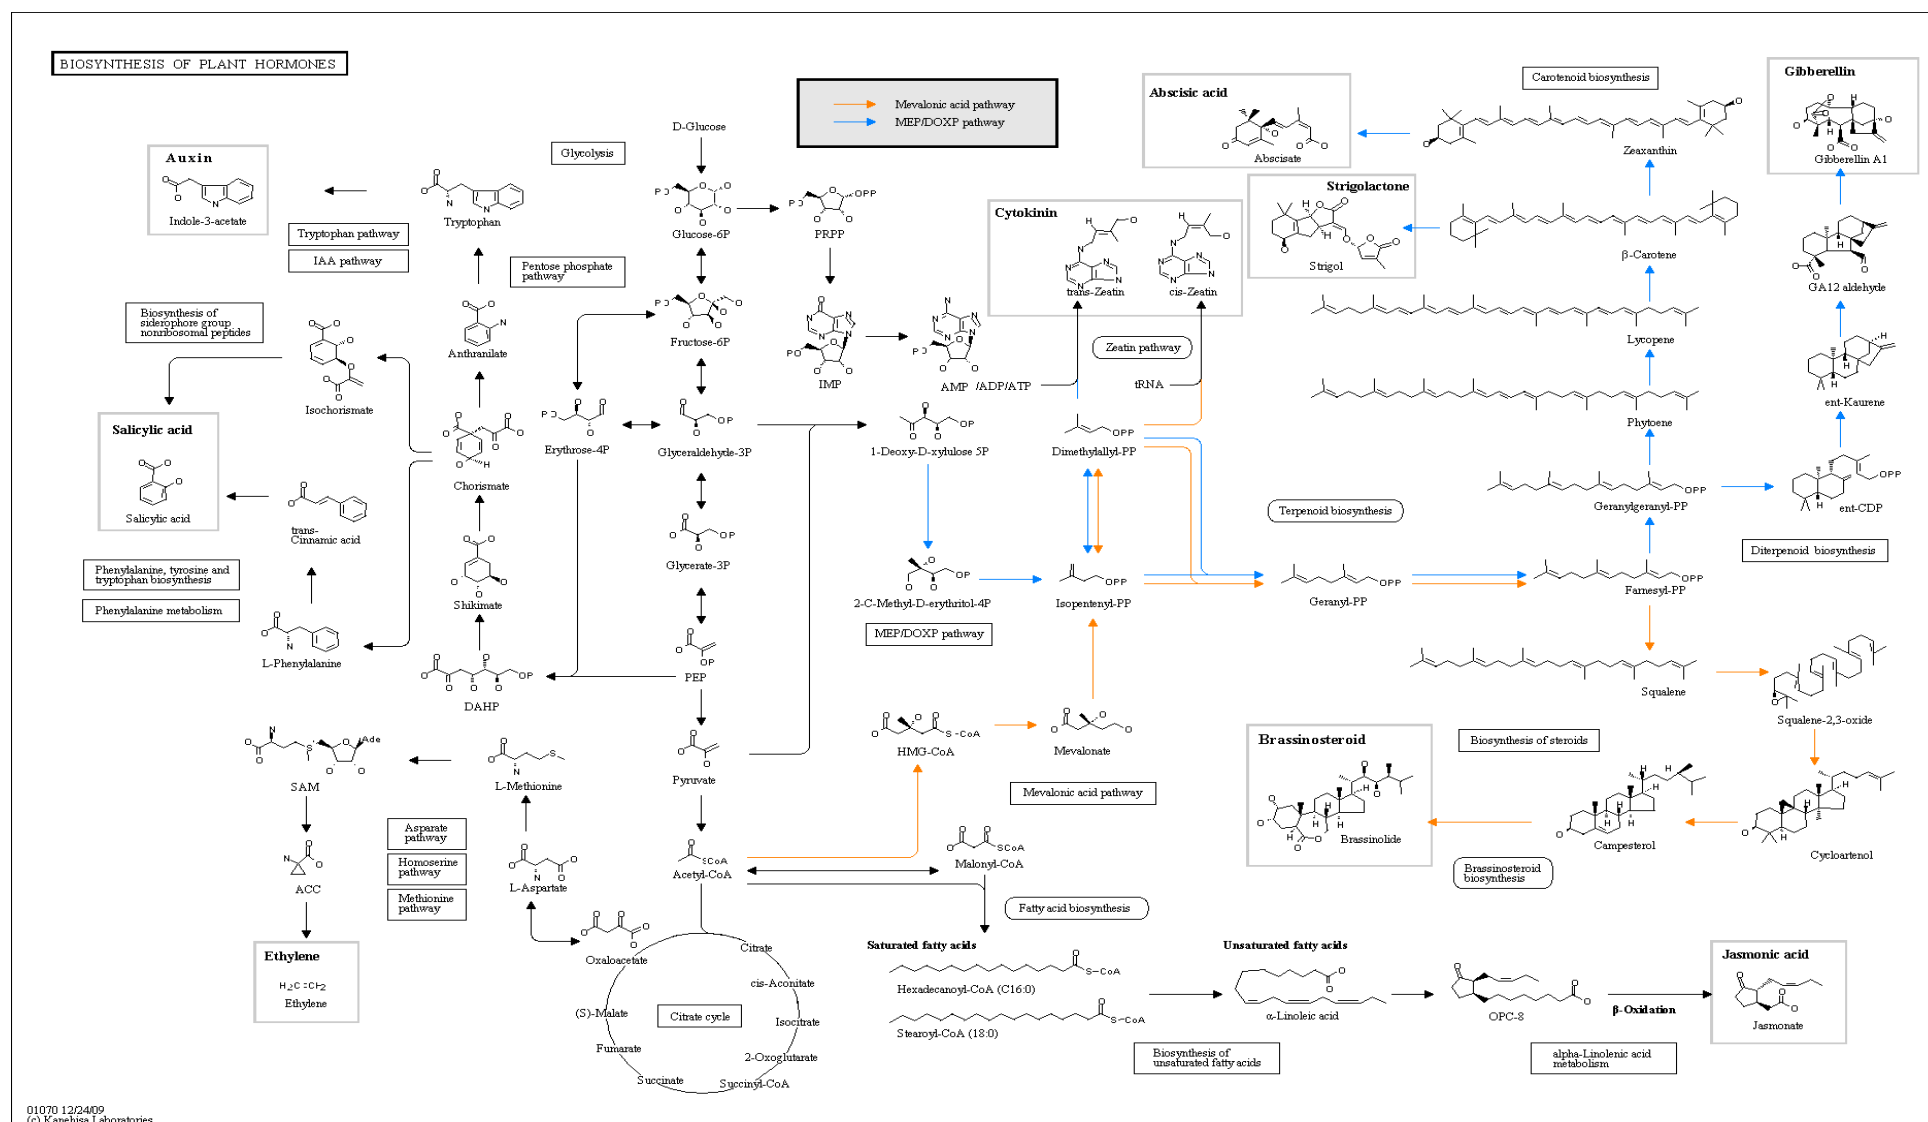

Figure 4. Biosynthesis pathways of plant hormones in *Pseudarthrobacter phenanthrenivorans* MHSD1 aligned against *Enterobacter* sp. 638. Orange arrows represent Mevalonic acid pathway and blue arrows represent MEP/DOXP pathway.

**Table 2. Genomic islands genes within *Pseudarthrobacter phenanthrenivorans* strain MHSD1 aligned against reference genome within *Pseudarthrobacter phenanthrenivorans* strain Sphe3 genome. The genomic islands genes prediction methods are represented by the following colours: IslandPath-DIMOB (blue), SIGI-HMM (orange), and integrated detection (empty blocks).**

| Prediction Method | Gene Name   | Product                                                                    |
|-------------------|-------------|----------------------------------------------------------------------------|
|                   | FJ661_10095 | hydantoinase B/oxoprolinase family protein                                 |
|                   | FJ661_10090 | hydantoinase/oxoprolinase family protein                                   |
|                   | solA        | N-methyl-L-tryptophan oxidase                                              |
|                   | FJ661_10080 | MurR/RpiR family transcriptional regulator                                 |
|                   | FJ661_10075 | hypothetical protein                                                       |
|                   | FJ661_10070 | LacI family transcriptional regulator                                      |
|                   | FJ661_10065 | ABC transporter ATP-binding protein                                        |
|                   | FJ661_10060 | sugar phosphate isomerase/epimerase                                        |
|                   | FJ661_10000 | N-acetylglucosamine-6-phosphate deacetylase                                |
|                   | FJ661_09995 | N-acetylmannosamine-6-phosphate 2-epimerase                                |
|                   | FJ661_09990 | ROK family protein                                                         |
|                   | FJ661_09985 | dihydrodipicolinate synthase family protein                                |
|                   | FJ661_09980 | ABC transporter ATP-binding protein                                        |
|                   | FJ661_09975 | dipeptide/oligopeptide/nickel ABC transporter permease/ATP-binding protein |
|                   | FJ661_09970 | ABC transporter permease                                                   |
|                   | FJ661_09965 | ABC transporter substrate-binding protein                                  |
|                   | FJ661_09960 | DUF4862 family protein                                                     |
|                   | FJ661_09955 | exo-alpha-sialidase                                                        |
|                   | FJ661_09950 | sialidase                                                                  |
|                   | FJ661_09945 | plasmid pRiA4b ORF-3 family protein                                        |
|                   | FJ661_09940 | recombinase family protein                                                 |
|                   | FJ661_09935 | ROK family protein                                                         |
|                   | FJ661_09930 | hypothetical protein                                                       |
|                   | FJ661_09925 | dextranase                                                                 |
|                   | FJ661_09920 | alpha-glucosidase                                                          |
|                   | FJ661_09915 | carbohydrate ABC transporter permease                                      |
|                   | FJ661_09910 | sugar ABC transporter permease                                             |
|                   | FJ661_09905 | extracellular solute-binding protein                                       |
|                   | FJ661_09900 | ROK family transcriptional regulator                                       |
|                   | FJ661_09895 | dextranase                                                                 |
|                   | FJ661_09890 | glucan 1,4-alpha-glucosidase                                               |
|                   | FJ661_09890 | glucan 1,4-alpha-glucosidase                                               |
|                   | FJ661_09885 | ROK family protein                                                         |
|                   | FJ661_09880 | hypothetical protein                                                       |
|                   | FJ661_09875 | Fis family transcriptional regulator                                       |
|                   | FJ661_09870 | helix-turn-helix transcriptional regulator                                 |

|  |             |                                                     |
|--|-------------|-----------------------------------------------------|
|  | FJ661_09865 | site-specific integrase                             |
|  | FJ661_09860 | DUF4193 domain-containing protein                   |
|  | FJ661_09855 | hypothetical protein                                |
|  | FJ661_09850 | hypothetical protein                                |
|  | FJ661_09845 | hypothetical protein                                |
|  | FJ661_09840 | GPP34 family phosphoprotein                         |
|  | ppsA        | phosphoenolpyruvate synthase                        |
|  | FJ661_09830 | kinase/pyrophosphorylase                            |
|  | FJ661_09825 | hypothetical protein                                |
|  | FJ661_09820 | lactate utilization protein C                       |
|  | FJ661_09815 | iron-sulfur cluster-binding protein                 |
|  | FJ661_09810 | (Fe-S)-binding protein                              |
|  | FJ661_09805 | L-lactate permease                                  |
|  | FJ661_09805 | L-lactate permease                                  |
|  | FJ661_09800 | FadR family transcriptional regulator               |
|  | FJ661_09795 | cytochrome d ubiquinol oxidase subunit II           |
|  | FJ661_09790 | pentapeptide repeat-containing protein              |
|  | FJ661_09785 | hypothetical protein                                |
|  | FJ661_09780 | hypothetical protein                                |
|  | FJ661_09775 | hypothetical protein                                |
|  | FJ661_09770 | recombinase family protein                          |
|  | FJ661_09765 | DUF4193 domain-containing protein                   |
|  | FJ661_09760 | Ldh family oxidoreductase                           |
|  | FJ661_09755 | DctP family TRAP transporter solute-binding subunit |
|  | FJ661_17905 | MFS transporter                                     |
|  | FJ661_17910 | hypothetical protein                                |
|  | FJ661_17915 | LamB/YcsF family protein                            |
|  | FJ661_17920 | DUF445 domain-containing protein                    |
|  | FJ661_17925 | glycerophosphodiester phosphodiesterase             |
|  | FJ661_17930 | hypothetical protein                                |
|  | FJ661_17935 | AziC family ABC transporter permease                |
|  | FJ661_17940 | AziD domain-containing protein                      |
|  | FJ661_17945 | hypothetical protein                                |
|  | FJ661_17950 | hypothetical protein                                |
|  | FJ661_17955 | hypothetical protein                                |
|  | FJ661_17960 | TetR/AcrR family transcriptional regulator          |
|  | FJ661_17965 | thiamine-binding protein                            |
|  | FJ661_17970 | O-methyltransferase                                 |
|  | FJ661_17975 | DNA starvation/stationary phase protection protein  |
|  | FJ661_17980 | CsbD family protein                                 |
|  | FJ661_17985 | hypothetical protein                                |

|  |             |                                                                       |
|--|-------------|-----------------------------------------------------------------------|
|  | FJ661_17990 | YihY/virulence factor BrkB family protein                             |
|  | FJ661_20625 | phage holin family protein                                            |
|  | FJ661_20630 | hypothetical protein                                                  |
|  | FJ661_13650 | hypothetical protein                                                  |
|  | FJ661_13645 | hypothetical protein                                                  |
|  | FJ661_13640 | NAD-dependent epimerase/dehydratase family protein                    |
|  | FJ661_13635 | sigma-70 family RNA polymerase sigma factor                           |
|  | FJ661_13630 | HAD-IIIa family hydrolase                                             |
|  | FJ661_13625 | glycosyltransferase family 9 protein                                  |
|  | FJ661_13620 | glycosyltransferase family 4 protein                                  |
|  | FJ661_13615 | glycosyltransferase family 1 protein                                  |
|  | FJ661_12340 | ExeM/NucH family extracellular endonuclease                           |
|  | FJ661_12330 | NAD(P)H-quinone oxidoreductase                                        |
|  | FJ661_12325 | PadR family transcriptional regulator                                 |
|  | FJ661_12320 | DUF1540 domain-containing protein                                     |
|  | FJ661_12315 | carbon starvation protein A                                           |
|  | FJ661_12310 | YbdD/YjiX family protein                                              |
|  | FJ661_12305 | bacterial proteasome activator family protein                         |
|  | FJ661_12300 | hypothetical protein                                                  |
|  | FJ661_12295 | aldo/keto reductase                                                   |
|  | FJ661_12290 | hypothetical protein                                                  |
|  | FJ661_12285 | hypothetical protein                                                  |
|  | FJ661_12280 | hypothetical protein                                                  |
|  | FJ661_12275 | hypothetical protein                                                  |
|  | FJ661_12270 | DNA-binding protein                                                   |
|  | FJ661_12265 | ABC transporter permease                                              |
|  | FJ661_12260 | hypothetical protein                                                  |
|  | FJ661_12255 | helix-turn-helix domain-containing protein                            |
|  | FJ661_12250 | hypothetical protein                                                  |
|  | FJ661_12245 | hypothetical protein                                                  |
|  | FJ661_12240 | hypothetical protein                                                  |
|  | FJ661_12235 | hypothetical protein                                                  |
|  | FJ661_12230 | hypothetical protein                                                  |
|  | FJ661_12225 | recombinase family protein                                            |
|  | FJ661_12215 | alpha/beta hydrolase                                                  |
|  | FJ661_12210 | DNA polymerase III subunit delta'                                     |
|  | FJ661_12205 | dTMP kinase                                                           |
|  | FJ661_12200 | aminotransferase class I/II-fold pyridoxal phosphate-dependent enzyme |
|  | FJ661_12195 | DUF2516 family protein                                                |
|  | FJ661_12190 | class I SAM-dependent methyltransferase                               |
|  | FJ661_12185 | phosphoglyceromutase                                                  |

|  |             |                                                                       |
|--|-------------|-----------------------------------------------------------------------|
|  | phoU        | phosphate signaling complex protein PhoU                              |
|  | FJ661_12175 | two-component sensor histidine kinase                                 |
|  | FJ661_16000 | amidase                                                               |
|  | FJ661_16005 | acetamidase                                                           |
|  | FJ661_16010 | FadR family transcriptional regulator                                 |
|  | FJ661_16015 | MFS transporter                                                       |
|  | FJ661_16020 | Lrp/AsnC family transcriptional regulator                             |
|  | hisC        | histidinol-phosphate transaminase                                     |
|  | FJ661_16030 | amino acid permease                                                   |
|  | FJ661_16035 | hypothetical protein                                                  |
|  | FJ661_16040 | hypothetical protein                                                  |
|  | FJ661_16045 | hypothetical protein                                                  |
|  | FJ661_16050 | trypsin-like peptidase domain-containing protein                      |
|  | FJ661_17995 | radical SAM protein                                                   |
|  | FJ661_18000 | helix-hairpin-helix domain-containing protein                         |
|  | FJ661_18005 | hypothetical protein                                                  |
|  | FJ661_18010 | AAA family ATPase                                                     |
|  | FJ661_18015 | DUF4234 domain-containing protein                                     |
|  | FJ661_18020 | hypothetical protein                                                  |
|  | FJ661_18025 | hypothetical protein                                                  |
|  | FJ661_18030 | FadR family transcriptional regulator                                 |
|  | FJ661_18035 | carbon-nitrogen hydrolase family protein                              |
|  | FJ661_18040 | APC family permease                                                   |
|  | FJ661_18045 | carbon-nitrogen hydrolase family protein                              |
|  | FJ661_18050 | SHOCT domain-containing protein                                       |
|  | FJ661_18055 | DUF262 domain-containing protein                                      |
|  | FJ661_18060 | aminotransferase class I/II-fold pyridoxal phosphate-dependent enzyme |
|  | FJ661_18065 | amino acid permease                                                   |
|  | FJ661_18070 | hypothetical protein                                                  |
|  | FJ661_18075 | hypothetical protein                                                  |
|  | FJ661_18075 | hypothetical protein                                                  |
|  | FJ661_18080 | hypothetical protein                                                  |
|  | FJ661_18085 | APC family permease                                                   |
|  | FJ661_18090 | carbon-nitrogen hydrolase family protein                              |
|  | FJ661_18095 | restriction endonuclease                                              |
|  | FJ661_18100 | amino acid transporter                                                |
|  | FJ661_18105 | lamin tail domain-containing protein                                  |
|  | FJ661_18110 | hypothetical protein                                                  |
|  | FJ661_18115 | DUF3427 domain-containing protein                                     |
|  | FJ661_18165 | MFS transporter                                                       |
|  | FJ661_18170 | nucleoside hydrolase                                                  |

|  |             |                                                                |
|--|-------------|----------------------------------------------------------------|
|  | FJ661_18175 | NAD(P)/FAD-dependent oxidoreductase                            |
|  | FJ661_18180 | hypothetical protein                                           |
|  | FJ661_18185 | hypothetical protein                                           |
|  | FJ661_18190 | DUF4230 domain-containing protein                              |
|  | FJ661_18195 | HNH endonuclease                                               |
|  | FJ661_18200 | hypothetical protein                                           |
|  | FJ661_18205 | SRPBCC family protein                                          |
|  | FJ661_18210 | antibiotic biosynthesis monooxygenase                          |
|  | FJ661_18215 | NAD(P)-dependent alcohol dehydrogenase                         |
|  | FJ661_18220 | iron-sulfur cluster assembly protein                           |
|  | FJ661_02485 | hypothetical protein                                           |
|  | FJ661_02480 | hypothetical protein                                           |
|  | FJ661_02475 | peroxidase-related enzyme                                      |
|  | FJ661_02470 | serine hydrolase family protein                                |
|  | FJ661_02465 | hypothetical protein                                           |
|  | FJ661_02460 | hypothetical protein                                           |
|  | minC        | septum site-determining protein MinC                           |
|  | FJ661_02450 | nuclear transport factor 2 family protein                      |
|  | FJ661_02445 | TetR/AcrR family transcriptional regulator                     |
|  | FJ661_02440 | GNAT family N-acetyltransferase                                |
|  | FJ661_02015 | energy-coupling factor transporter transmembrane protein Ecft  |
|  | FJ661_02010 | ABC transporter ATP-binding protein                            |
|  | FJ661_02005 | biotin transporter BioY                                        |
|  | FJ661_02000 | methyltransferase domain-containing protein                    |
|  | FJ661_01995 | VOC family protein                                             |
|  | FJ661_01990 | hypothetical protein                                           |
|  | FJ661_01985 | hypothetical protein                                           |
|  | FJ661_01980 | hypothetical protein                                           |
|  | FJ661_01975 | transcription initiation protein                               |
|  | FJ661_01970 | LD-carboxypeptidase                                            |
|  | FJ661_01965 | uridine kinase                                                 |
|  | FJ661_00025 | hypothetical protein                                           |
|  | FJ661_00015 | NAD-dependent protein deacetylase                              |
|  | FJ661_00010 | peroxiredoxin                                                  |
|  | FJ661_00005 | DUF3052 domain-containing protein                              |
|  | FJ661_20640 | pyruvate dehydrogenase (acetyl-transferring), homodimeric type |
|  | FJ661_16055 | pyruvate dehydrogenase (acetyl-transferring), homodimeric type |
|  | FJ661_16060 | PucR family transcriptional regulator                          |
|  | FJ661_16065 | ACP S-malonyltransferase                                       |
|  | FJ661_17085 | type II secretion system F family protein                      |
|  | FJ661_17090 | type II secretion system protein F                             |

|  |             |                                                 |
|--|-------------|-------------------------------------------------|
|  | FJ661_17095 | CpaF family protein                             |
|  | FJ661_17100 | hypothetical protein                            |
|  | FJ661_17105 | glycoside hydrolase                             |
|  | FJ661_17110 | hypothetical protein                            |
|  | FJ661_17115 | DUF2142 domain-containing protein               |
|  | FJ661_17120 | transposase                                     |
|  | FJ661_20585 | IS481 family transposase                        |
|  | FJ661_07225 | hypothetical protein                            |
|  | FJ661_07220 | sugar nucleotide-binding protein                |
|  | rfbB        | dTDP-glucose 4,6-dehydratase                    |
|  | FJ661_07210 | glycosyltransferase                             |
|  | FJ661_07205 | polysaccharide biosynthesis protein             |
|  | FJ661_07200 | glycosyltransferase family 2 protein            |
|  | FJ661_07195 | DUF2304 domain-containing protein               |
|  | FJ661_07190 | glycosyltransferase                             |
|  | FJ661_07185 | glycosyltransferase                             |
|  | rfbA        | glucose-1-phosphate thymidyltransferase RfbA    |
|  | FJ661_07175 | hypothetical protein                            |
|  | FJ661_06190 | phosphoglucosamine mutase                       |
|  | rpsI        | 30S ribosomal protein S9                        |
|  | rplM        | 50S ribosomal protein L13                       |
|  | FJ661_06175 | prepilin peptidase                              |
|  | FJ661_06170 | Flp family type IVb pilin                       |
|  | FJ661_06165 | pilus assembly protein                          |
|  | FJ661_06160 | hypothetical protein                            |
|  | FJ661_06155 | pilus assembly protein CpaB                     |
|  | FJ661_06150 | MinD/ParA family protein                        |
|  | FJ661_06145 | CpaF family protein                             |
|  | FJ661_06140 | type II secretion system protein F              |
|  | FJ661_06135 | type II secretion system F family protein       |
|  | FJ661_06130 | Flp family type IVb pilin                       |
|  | FJ661_06125 | pilus assembly protein                          |
|  | FJ661_06120 | pilus assembly protein TadG                     |
|  | FJ661_06115 | flagellar biosynthesis protein FlgA             |
|  | FJ661_06110 | MinD/ParA family protein                        |
|  | FJ661_04710 | hypothetical protein                            |
|  | FJ661_04705 | hypothetical protein                            |
|  | FJ661_04700 | polysaccharide biosynthesis tyrosine autokinase |
|  | FJ661_04695 | ISL3 family transposase                         |
|  | pseI        | pseudaminic acid synthase                       |
|  | FJ661_04685 | hypothetical protein                            |

|  |             |                                                                                 |
|--|-------------|---------------------------------------------------------------------------------|
|  | FJ661_04680 | glycosyl hydrolase                                                              |
|  | FJ661_04675 | glycosyltransferase                                                             |
|  | FJ661_04670 | glycosyltransferase                                                             |
|  | FJ661_04665 | hypothetical protein                                                            |
|  | pseB        | UDP-N-acetylglucosamine 4,6-dehydratase (inverting)                             |
|  | FJ661_04655 | UDP-4-amino-4, 6-dideoxy-N-acetyl-beta-L-altrosamine transaminase               |
|  | FJ661_04650 | spore coat protein                                                              |
|  | FJ661_04645 | UDP-2,4-diacetamido-2,4, 6-trideoxy-beta-L-altropyranose hydrolase              |
|  | FJ661_04640 | sugar transferase                                                               |
|  | FJ661_04635 | DUF4012 domain-containing protein                                               |
|  | FJ661_04630 | LPXTG cell wall anchor domain-containing protein                                |
|  | FJ661_04625 | VanZ family protein                                                             |
|  | galU        | UTP--glucose-1-phosphate uridylyltransferase GalU                               |
|  | FJ661_04615 | Hpt domain-containing protein                                                   |
|  | csrA        | carbon storage regulator CsrA                                                   |
|  | FJ661_04605 | hypothetical protein                                                            |
|  | FJ661_04600 | sigma-70 family RNA polymerase sigma factor                                     |
|  | FJ661_04595 | FHIPEP family type III secretion protein                                        |
|  | FJ661_04590 | EscU/YscU/HrcU family type III secretion system export apparatus switch protein |
|  | FJ661_04740 | response regulator transcription factor                                         |
|  | FJ661_04735 | hypothetical protein                                                            |
|  | FJ661_04730 | signal peptidase I                                                              |
|  | FJ661_04725 | hypothetical protein                                                            |
|  | FJ661_04720 | MinD/ParA family protein                                                        |
|  | FJ661_04715 | winged helix-turn-helix transcriptional regulator                               |
|  | FJ661_04710 | hypothetical protein                                                            |
|  | FJ661_04705 | hypothetical protein                                                            |
|  | FJ661_04700 | polysaccharide biosynthesis tyrosine autokinase                                 |
|  | FJ661_04695 | ISL3 family transposase                                                         |
|  | pseI        | pseudaminic acid synthase                                                       |
|  | FJ661_04685 | hypothetical protein                                                            |
|  | FJ661_04680 | glycosyl hydrolase                                                              |
|  | FJ661_04675 | glycosyltransferase                                                             |
|  | FJ661_04670 | glycosyltransferase                                                             |
|  | FJ661_04665 | hypothetical protein                                                            |
|  | pseB        | UDP-N-acetylglucosamine 4,6-dehydratase (inverting)                             |
|  | FJ661_04655 | UDP-4-amino-4, 6-dideoxy-N-acetyl-beta-L-altrosamine transaminase               |
|  | FJ661_04650 | spore coat protein                                                              |
|  | FJ661_04645 | UDP-2,4-diacetamido-2,4, 6-trideoxy-beta-L-altropyranose hydrolase              |
|  | FJ661_04640 | sugar transferase                                                               |
|  | FJ661_04635 | DUF4012 domain-containing protein                                               |

|  |             |                                                                                 |
|--|-------------|---------------------------------------------------------------------------------|
|  | FJ661_04630 | LPXTG cell wall anchor domain-containing protein                                |
|  | FJ661_04625 | VanZ family protein                                                             |
|  | galU        | UTP--glucose-1-phosphate uridylyltransferase GalU                               |
|  | FJ661_04615 | Hpt domain-containing protein                                                   |
|  | csrA        | carbon storage regulator CsrA                                                   |
|  | FJ661_04605 | hypothetical protein                                                            |
|  | FJ661_04600 | sigma-70 family RNA polymerase sigma factor                                     |
|  | FJ661_04595 | FHIPEP family type III secretion protein                                        |
|  | FJ661_04590 | EscU/YscU/HrcU family type III secretion system export apparatus switch protein |
|  | FJ661_04585 | flagellar biosynthetic protein FliR                                             |
|  | fliQ        | flagellar biosynthesis protein FliQ                                             |
|  | fliP        | flagellar type III secretion system pore protein FliP                           |
|  | FJ661_04570 | flagellar biosynthetic protein FliO                                             |
|  | fliN        | flagellar motor switch protein FliN                                             |
|  | FJ661_04560 | hypothetical protein                                                            |
|  | FJ661_04555 | flagellar motor protein MotB                                                    |
|  | FJ661_04550 | motility protein A                                                              |
|  | FJ661_04545 | hypothetical protein                                                            |
|  | FJ661_04540 | flagellar hook protein FlgE                                                     |
|  | FJ661_04535 | flagellar hook capping protein                                                  |
|  | FJ661_04530 | flagellar hook-length control protein FliK                                      |
|  | FJ661_04525 | NlpC/P60 family protein                                                         |
|  | FJ661_04520 | flagellar export protein FliJ                                                   |
|  | FJ661_04515 | FliI/YscN family ATPase                                                         |
|  | FJ661_04510 | hypothetical protein                                                            |
|  | fliG        | flagellar motor switch protein FliG                                             |
|  | fliF        | flagellar M-ring protein FliF                                                   |
|  | fliE        | flagellar hook-basal body complex protein FliE                                  |
|  | FJ661_04490 | flagellar basal-body rod protein FlgC                                           |
|  | FJ661_04485 | flagellar biosynthesis protein FlgB                                             |
|  | FJ661_04480 | hypothetical protein                                                            |
|  | FJ661_10705 | FAD-binding oxidoreductase                                                      |
|  | FJ661_10710 | L-lactate permease                                                              |
|  | FJ661_10715 | GntR family transcriptional regulator                                           |
|  | FJ661_10720 | alpha/beta hydrolase                                                            |
|  | FJ661_10725 | enoyl-ACP reductase                                                             |
|  | metH        | methionine synthase                                                             |
|  | FJ661_10735 | hypothetical protein                                                            |
|  | FJ661_10740 | hypothetical protein                                                            |
|  | FJ661_10745 | hypothetical protein                                                            |
|  | FJ661_10750 | hypothetical protein                                                            |

|  |             |                                                    |
|--|-------------|----------------------------------------------------|
|  | FJ661_10755 | ABC transporter ATP-binding protein                |
|  | FJ661_10760 | ABC transporter ATP-binding protein                |
|  | FJ661_10765 | hydrolase                                          |
|  | FJ661_10770 | substrate-binding domain-containing protein        |
|  | FJ661_10775 | gluconate 2-dehydrogenase subunit 3 family protein |
|  | FJ661_10780 | GMC family oxidoreductase                          |
|  | FJ661_10785 | aldo/keto reductase                                |
|  | FJ661_10790 | ABC transporter permease                           |
|  | FJ661_14510 | helix-turn-helix transcriptional regulator         |
|  | FJ661_14515 | sugar transferase                                  |
|  | FJ661_14520 | Gfo/Idh/MocA family oxidoreductase                 |
|  | FJ661_14525 | NAD-dependent epimerase/dehydratase family protein |
|  | FJ661_14530 | DegT/DnrJ/EryC1/StrS family aminotransferase       |
|  | FJ661_14535 | acetyltransferase                                  |
|  | FJ661_14540 | glycosyltransferase family 2 protein               |
|  | FJ661_14545 | glycosyltransferase                                |
|  | FJ661_14550 | lipopolysaccharide biosynthesis protein            |
|  | FJ661_14555 | DegT/DnrJ/EryC1/StrS family aminotransferase       |
|  | FJ661_14560 | glycosyltransferase family 2 protein               |
|  | FJ661_14565 | hypothetical protein                               |
|  | FJ661_14570 | O-antigen ligase domain-containing protein         |
|  | FJ661_14575 | hypothetical protein                               |
|  | FJ661_14580 | hypothetical protein                               |
|  | FJ661_14585 | hypothetical protein                               |
|  | FJ661_14590 | WecB/TagA/CpsF family glycosyltransferase          |
|  | FJ661_14595 | hypothetical protein                               |
|  | FJ661_14600 | DUF4082 domain-containing protein                  |
|  | FJ661_14915 | nitrate reductase                                  |
|  | FJ661_14920 | hypothetical protein                               |
|  | FJ661_14925 | glyoxalase                                         |
|  | FJ661_14930 | hypothetical protein                               |
|  | FJ661_14935 | LysR family transcriptional regulator              |
|  | FJ661_20655 | phage holin family protein                         |
|  | FJ661_20660 | hypothetical protein                               |
|  | FJ661_20310 | recombinase family protein                         |
|  | FJ661_20305 | hypothetical protein                               |
|  | FJ661_20300 | hypothetical protein                               |
|  | FJ661_20295 | DUF91 domain-containing protein                    |
|  | FJ661_20290 | HNH endonuclease                                   |
|  | FJ661_20285 | GIY-YIG nuclease family protein                    |
|  | FJ661_20280 | ATP-binding protein                                |

|  |             |                                                                |
|--|-------------|----------------------------------------------------------------|
|  | FJ661_20275 | hypothetical protein                                           |
|  | FJ661_20270 | DNA methyltransferase                                          |
|  | FJ661_20265 | DUF262 domain-containing protein                               |
|  | FJ661_20260 | helix-turn-helix domain-containing protein                     |
|  | FJ661_20255 | hypothetical protein                                           |
|  | FJ661_20250 | YfbU family protein                                            |
|  | FJ661_20245 | hypothetical protein                                           |
|  | FJ661_20240 | hypothetical protein                                           |
|  | FJ661_20235 | ATP-dependent DNA ligase                                       |
|  | FJ661_20245 | hypothetical protein                                           |
|  | FJ661_20240 | hypothetical protein                                           |
|  | FJ661_20235 | ATP-dependent DNA ligase                                       |
|  | FJ661_20230 | hypothetical protein                                           |
|  | FJ661_20225 | hypothetical protein                                           |
|  | FJ661_20220 | hypothetical protein                                           |
|  | FJ661_20215 | DUF4192 domain-containing protein                              |
|  | FJ661_20210 | IS110 family transposase                                       |
|  | FJ661_20205 | hypothetical protein                                           |
|  | FJ661_20200 | hypothetical protein                                           |
|  | FJ661_20195 | hypothetical protein                                           |
|  | FJ661_20190 | GNAT family N-acetyltransferase                                |
|  | FJ661_20185 | hypothetical protein                                           |
|  | FJ661_20180 | hypothetical protein                                           |
|  | FJ661_20175 | hypothetical protein                                           |
|  | FJ661_20170 | hypothetical protein                                           |
|  | FJ661_20165 | hypothetical protein                                           |
|  | FJ661_20160 | alpha/beta hydrolase                                           |
|  | FJ661_20155 | hypothetical protein                                           |
|  | FJ661_20150 | DUF2199 domain-containing protein                              |
|  | FJ661_20145 | SRPBCC family protein                                          |
|  | FJ661_20140 | recombinase family protein                                     |
|  | dprA        | DNA-protecting protein DprA                                    |
|  | FJ661_20680 | pyruvate dehydrogenase (acetyl-transferring), homodimeric type |
|  | FJ661_20635 | Lsr2 family protein                                            |
|  | FJ661_20570 | DUF4192 domain-containing protein                              |
|  | FJ661_20575 | hypothetical protein                                           |
|  | hflB        | ATP-dependent zinc metalloprotease FtsH                        |
|  | FJ661_20555 | SGNH/GDSL hydrolase family protein                             |
|  | FJ661_20590 | phage holin family protein                                     |
|  | FJ661_20595 | DUF3618 domain-containing protein                              |
|  | FJ661_20690 | pyruvate dehydrogenase (acetyl-transferring), homodimeric type |

|  |             |                                                                                              |
|--|-------------|----------------------------------------------------------------------------------------------|
|  | FJ661_19445 | (2Fe-2S)-binding protein                                                                     |
|  | FJ661_19450 | xanthine dehydrogenase family protein subunit M                                              |
|  | FJ661_19455 | CdaR family transcriptional regulator                                                        |
|  | FJ661_19460 | CdaR family transcriptional regulator                                                        |
|  | FJ661_19465 | DUF861 domain-containing protein                                                             |
|  | FJ661_19470 | alpha/beta hydrolase                                                                         |
|  | FJ661_19475 | xanthine dehydrogenase family protein molybdopterin-binding subunit                          |
|  | FJ661_19480 | Dabb family protein                                                                          |
|  | FJ661_19485 | cyclase family protein                                                                       |
|  | FJ661_19490 | 2,6-dihydroxypyridine 3-hydroxylase                                                          |
|  | FJ661_19495 | carbon monoxide dehydrogenase                                                                |
|  | FJ661_19500 | carbon-nitrogen family hydrolase                                                             |
|  | FJ661_19505 | MoxR family ATPase                                                                           |
|  | FJ661_19510 | VWA domain-containing protein                                                                |
|  | FJ661_19515 | XdhC family protein                                                                          |
|  | FJ661_19520 | hypothetical protein                                                                         |
|  | FJ661_19525 | nucleotidyltransferase family protein                                                        |
|  | FJ661_19530 | PucR family transcriptional regulator                                                        |
|  | FJ661_19535 | APC family permease                                                                          |
|  | FJ661_19540 | heavy metal-responsive transcriptional regulator                                             |
|  | merA        | mercury(II) reductase                                                                        |
|  | FJ661_19550 | AAA family ATPase                                                                            |
|  | FJ661_19555 | IS21 family transposase                                                                      |
|  | purU        | formyltetrahydrofolate deformylase                                                           |
|  | FJ661_19565 | FAD-dependent oxidoreductase                                                                 |
|  | FJ661_19570 | bifunctional methylenetetrahydrofolate dehydrogenase/methenyltetrahydrofolate cyclohydrolase |
|  | FJ661_19575 | DUF2437 domain-containing protein                                                            |
|  | FJ661_19580 | NAD-dependent succinate-semialdehyde dehydrogenase                                           |
|  | FJ661_19530 | PucR family transcriptional regulator                                                        |
|  | FJ661_19535 | APC family permease                                                                          |
|  | FJ661_19540 | heavy metal-responsive transcriptional regulator                                             |
|  | merA        | mercury(II) reductase                                                                        |
|  | FJ661_19550 | AAA family ATPase                                                                            |
|  | FJ661_19555 | IS21 family transposase                                                                      |
|  | purU        | formyltetrahydrofolate deformylase                                                           |
|  | FJ661_19565 | FAD-dependent oxidoreductase                                                                 |
|  | FJ661_19570 | bifunctional methylenetetrahydrofolate dehydrogenase/methenyltetrahydrofolate cyclohydrolase |
|  | FJ661_19575 | DUF2437 domain-containing protein                                                            |
|  | FJ661_19580 | NAD-dependent succinate-semialdehyde dehydrogenase                                           |
|  | FJ661_19585 | FAD-dependent oxidoreductase                                                                 |
|  | FJ661_19590 | DUF861 domain-containing protein                                                             |

|  |             |                                                                    |
|--|-------------|--------------------------------------------------------------------|
|  | FJ661_19595 | NAD(P)H-dependent oxidoreductase                                   |
|  | FJ661_19600 | hypothetical protein                                               |
|  | FJ661_19605 | hypothetical protein                                               |
|  | FJ661_19610 | betaine/proline/choline family ABC transporter ATP-binding protein |
|  | FJ661_19615 | ABC transporter permease subunit                                   |
|  | FJ661_19620 | hypothetical protein                                               |
|  | FJ661_19625 | hypothetical protein                                               |
|  | FJ661_19630 | site-specific integrase                                            |
|  | FJ661_19635 | helix-turn-helix transcriptional regulator                         |
|  | FJ661_19640 | hypothetical protein                                               |
|  | FJ661_19645 | META domain-containing protein                                     |
|  | FJ661_19650 | hypothetical protein                                               |
|  | FJ661_19655 | hypothetical protein                                               |
|  | FJ661_19660 | KfrA protein                                                       |
|  | FJ661_19665 | helix-turn-helix domain-containing protein                         |
|  | FJ661_19670 | hypothetical protein                                               |
|  | FJ661_19675 | relaxase                                                           |
|  | FJ661_20435 | recombinase family protein                                         |
|  | FJ661_20440 | DDE-type integrase/transposase/recombinase                         |
|  | FJ661_20445 | ATP-binding protein                                                |
|  | FJ661_20450 | hypothetical protein                                               |
|  | FJ661_20455 | STAS/SEC14 domain-containing protein                               |
|  | FJ661_20460 | GAF and ANTAR domain-containing protein                            |
|  | FJ661_20465 | DUF2905 domain-containing protein                                  |
|  | FJ661_20470 | DUF3040 domain-containing protein                                  |
|  | FJ661_19705 | transposase                                                        |
|  | FJ661_19710 | hypothetical protein                                               |
|  | FJ661_19715 | hypothetical protein                                               |
|  | FJ661_19720 | hypothetical protein                                               |
|  | FJ661_19725 | hypothetical protein                                               |
|  | FJ661_19730 | DNA cytosine methyltransferase                                     |
|  | FJ661_19735 | sigma-70 family RNA polymerase sigma factor                        |
|  | FJ661_19740 | hypothetical protein                                               |
|  | FJ661_19745 | hypothetical protein                                               |
|  | FJ661_19750 | hypothetical protein                                               |
|  | FJ661_19755 | hypothetical protein                                               |
|  | FJ661_19760 | ParB/RepB/Spo0J family partition protein                           |
|  | FJ661_19765 | hypothetical protein                                               |
|  | FJ661_19770 | MobC family plasmid mobilization relaxosome protein                |
|  | FJ661_19775 | relaxase                                                           |
|  | FJ661_19780 | hypothetical protein                                               |

|  |             |                                                                  |
|--|-------------|------------------------------------------------------------------|
|  | FJ661_19805 | type IV secretory system conjugative DNA transfer family protein |
|  | FJ661_19810 | ATP-binding protein                                              |
|  | FJ661_19815 | hypothetical protein                                             |
|  | FJ661_19820 | hypothetical protein                                             |
|  | FJ661_19825 | hypothetical protein                                             |
|  | FJ661_19830 | hypothetical protein                                             |
|  | FJ661_19835 | hypothetical protein                                             |
|  | FJ661_19840 | chromosome partitioning protein ParA                             |
|  | FJ661_19845 | hypothetical protein                                             |
|  | FJ661_19850 | M23 family metalloproteinase                                     |
|  | FJ661_19855 | helix-turn-helix transcriptional regulator                       |
|  | FJ661_19860 | hypothetical protein                                             |
|  | FJ661_19865 | helix-turn-helix domain-containing protein                       |
|  | FJ661_19870 | ParA family protein                                              |
|  | FJ661_19875 | hypothetical protein                                             |
|  | FJ661_19880 | AsnC family protein                                              |
|  | FJ661_19885 | recombinase family protein                                       |
|  | FJ661_19890 | helicase                                                         |
|  | FJ661_19895 | hypothetical protein                                             |
|  | FJ661_19900 | hypothetical protein                                             |
|  | FJ661_19905 | recombinase family protein                                       |
|  | FJ661_19910 | hypothetical protein                                             |
|  | FJ661_19915 | alpha/beta hydrolase                                             |
|  | FJ661_19920 | GNAT family N-acetyltransferase                                  |
|  | FJ661_19925 | IS256 family transposase                                         |
|  | FJ661_20675 | hypothetical protein                                             |
|  | FJ661_20560 | IS21 family transposase                                          |
|  | FJ661_20565 | ATP-binding protein                                              |
|  | FJ661_20695 | hypothetical protein                                             |
|  | FJ661_20685 | pyruvate dehydrogenase (acetyl-transferring), homodimeric type   |
|  | lipA        | lipoyl synthase                                                  |
|  | FJ661_20665 | pyruvate dehydrogenase (acetyl-transferring), homodimeric type   |
|  | FJ661_20700 | hypothetical protein                                             |
|  | FJ661_20475 | DUF3040 domain-containing protein                                |
|  | FJ661_20480 | DUF2905 domain-containing protein                                |
|  | FJ661_20685 | pyruvate dehydrogenase (acetyl-transferring), homodimeric type   |
|  | lipA        | lipoyl synthase                                                  |
|  | FJ661_20665 | pyruvate dehydrogenase (acetyl-transferring), homodimeric type   |
|  | FJ661_20700 | hypothetical protein                                             |
|  | FJ661_20475 | DUF3040 domain-containing protein                                |
|  | FJ661_20480 | DUF2905 domain-containing protein                                |

|  |             |                                                                     |
|--|-------------|---------------------------------------------------------------------|
|  | FJ661_20485 | GAF and ANTAR domain-containing protein                             |
|  | FJ661_20490 | heavy metal-responsive transcriptional regulator                    |
|  | merA        | mercury(II) reductase                                               |
|  | FJ661_20500 | AAA family ATPase                                                   |
|  | FJ661_20505 | IS21 family transposase                                             |
|  | FJ661_20510 | DNA replication protein                                             |
|  | FJ661_20580 | ISL3 family transposase                                             |
|  | FJ661_20670 | Hsp20/alpha crystallin family protein                               |
|  | FJ661_20605 | IS21 family transposase                                             |
|  | FJ661_20610 | DNA replication protein                                             |
|  | FJ661_20615 | Lsr2 family protein                                                 |
|  | FJ661_20645 | DNA replication protein                                             |
|  | hflB        | ATP-dependent zinc metalloprotease FtsH                             |
|  | FJ661_20545 | SGNH/GDSL hydrolase family protein                                  |
|  | FJ661_19930 | hypothetical protein                                                |
|  | FJ661_19935 | DUF948 domain-containing protein                                    |
|  | hflB        | ATP-dependent zinc metalloprotease FtsH                             |
|  | FJ661_20545 | SGNH/GDSL hydrolase family protein                                  |
|  | FJ661_19930 | hypothetical protein                                                |
|  | FJ661_19935 | DUF948 domain-containing protein                                    |
|  | FJ661_19940 | (S)-6-hydroxynicotine oxidase                                       |
|  | FJ661_19945 | xanthine dehydrogenase family protein molybdopterin-binding subunit |
|  | FJ661_19950 | (2Fe-2S)-binding protein                                            |
|  | FJ661_19955 | xanthine dehydrogenase family protein subunit M                     |
|  | FJ661_19960 | MoaD/ThiS family protein                                            |
|  | moaA        | GTP 3',8-cyclase MoaA                                               |
|  | FJ661_19970 | molybdopterin molybdotransferase MoeA                               |
|  | moaC        | cyclic pyranopterin monophosphate synthase MoaC                     |
|  | FJ661_19980 | molybdenum cofactor biosynthesis protein MoaE                       |
|  | modA        | molybdate ABC transporter substrate-binding protein                 |
|  | modB        | molybdate ABC transporter permease subunit                          |
|  | FJ661_19995 | ABC transporter ATP-binding protein                                 |
|  | FJ661_20000 | hypothetical protein                                                |
|  | FJ661_20005 | glycoside hydrolase family 3 protein                                |
|  | FJ661_20010 | MFS transporter                                                     |
|  | FJ661_20015 | MFS transporter                                                     |
|  | FJ661_20020 | hypothetical protein                                                |
|  | FJ661_20025 | IS630 family transposase                                            |
|  | FJ661_20030 | helix-turn-helix domain-containing protein                          |
|  | FJ661_20035 | hypothetical protein                                                |
|  | FJ661_20040 | hypothetical protein                                                |

|  |             |                                   |
|--|-------------|-----------------------------------|
|  | FJ661_20045 | DUF4913 domain-containing protein |
|  | FJ661_20050 | conjugal transfer protein         |

**Table 3. Comparative studies of genes responsible for endophytic behaviour. sp. 638 is *Enterobacter* sp. 638 , MHSD1 is *Pseudarthrobacter phenanthrenivorans* MHSD1, Sphe3 is *Pseudarthrobacter phenanthrenivorans* Sphe3. A (-) represents the absence of genes responsible for endophytic behaviour and (+) indicated the presence of gene in the genome. The table was adapted from studies done by Ali *et al.* (2014)**

| Function                      |                                                                            | sp. 638 | MHSD1 | Sphe3 |
|-------------------------------|----------------------------------------------------------------------------|---------|-------|-------|
| Transport                     | Lysine exporter protein lyse/ygga                                          | +       | +     | +     |
|                               | Major facilitator superfamily protein                                      | -       | +     | +     |
|                               | Branched-chain amino acid ABC transporter ATPase                           | +       | -     | -     |
|                               | Branched-chain amino acid ABC transporter inner membrane protein           | +       | -     | -     |
|                               | NAD(P)(+) transhydrogenase (AB-specific)                                   | -       | +     | +     |
|                               | ABC transporter related                                                    | +       | +     | +     |
|                               | Metabolite/H <sub>2</sub> O symporter, major facilitator superfamily (MFS) | -       | -     | -     |
|                               | Extracellular solute-binding protein family 1                              | -       | +     | +     |
|                               | Gluconate 2-dehydrogenase (acceptor)                                       | -       | +     | +     |
|                               | Gluconate 2-dehydrogenase (acceptor)                                       | -       | +     | +     |
|                               | Gluconate 2-dehydrogenase (acceptor)                                       | -       | +     | +     |
| Secretion and delivery system | Type VI secretion protein, VC_A0107 family                                 | -       | -     | -     |
|                               | Type VI secretion protein, EvpB/VC_A0108 family                            | -       | -     | -     |
|                               | Type VI secretion ATPase, ClpV1 family                                     | -       | -     | -     |
|                               | RND family efflux transporter MFP subunit                                  | +       | -     | -     |
| Phyto-functional assays       | Phosphorus solubilisation                                                  | -       | -     | -     |

|                                         |                                                                             |   |   |   |
|-----------------------------------------|-----------------------------------------------------------------------------|---|---|---|
|                                         | IAA (indole-3-acetic acid) production                                       | - | - | - |
|                                         | ACC (1-aminocyclopropane-1-carboxylate) deaminase                           | - | - | - |
|                                         | Siderophore production                                                      | + | + | + |
|                                         | Nitrogen fixation                                                           | + | + | - |
| Plant polymer degradation/ modification | Alpha/beta hydrolase fold                                                   | - | - | + |
|                                         | Alpha, alpha-trehalase                                                      | + | - | - |
|                                         | Cupin                                                                       | + | + | + |
|                                         | Peptidase M48 Ste24p                                                        | + | - | - |
| Transcriptional regulator               | AsnC family transcriptional regulator                                       | - | + | + |
|                                         | Regulator protein FrmR                                                      | + | - | - |
|                                         | AraC family transcriptional regulator                                       | - | - | - |
|                                         | Two component transcriptional regulator , winged helix family               | - | + | + |
|                                         | Transcriptional regulator, DeoR family                                      | - | + | + |
|                                         | Transcriptional regulator, LysR family                                      | - | + | + |
|                                         | Transcriptional regulator ,LytR family                                      | + | + | - |
|                                         | LrgB family protein                                                         | - | - | - |
|                                         | Flavoprotein WrbA                                                           | + | - | - |
| Detoxification                          | Glutathione S-transferase                                                   | + | + | + |
|                                         | Short-chain dehydrogenase/reductase SDR                                     | + | - | - |
|                                         | S-(hydroxymethyl) glutathione dehydrogenase/class III alcohol dehydrogenase | - | - | - |
|                                         | 2-dehydropantoate2-reductase                                                | + | - | - |
| Redox potential maintenance             | Acetoacetyl-coa reductase                                                   | - | - | - |
|                                         | Acetaldehyde dehydrogenase                                                  | - | - | - |
|                                         | Carbonate dehydratase                                                       | + | - | - |
|                                         | Aldehyde dehydrogenase                                                      | - | + | + |
|                                         | Malate/L-lactate dehydrogenase                                              | + | + | + |
|                                         | 3-hydroxyisobutyrate dehydrogenase                                          | - | + | + |

|                                  |                                           |   |   |   |
|----------------------------------|-------------------------------------------|---|---|---|
| Virulence and antibiotic factors | YihY/virulence factor BrkB family protein | - | + | + |
|                                  | Polyketide antibiotic transporter         | - | - | + |
|                                  | Antibiotic biosynthesis monooxygenase     | + | + | + |
| Other                            | 2-isopropylmalate synthase                | + | + | + |
|                                  | Diaminopimelate decarboxylase             | + | + | + |
